# Supplementary material
Source: Springer Nature journal article supplement (https://www.springermedizin.de/resource/supplementary/12885_2007_960_MOESM5_ESM.pdf/9471256)

# COX model

## Time to event is "Professional delay"

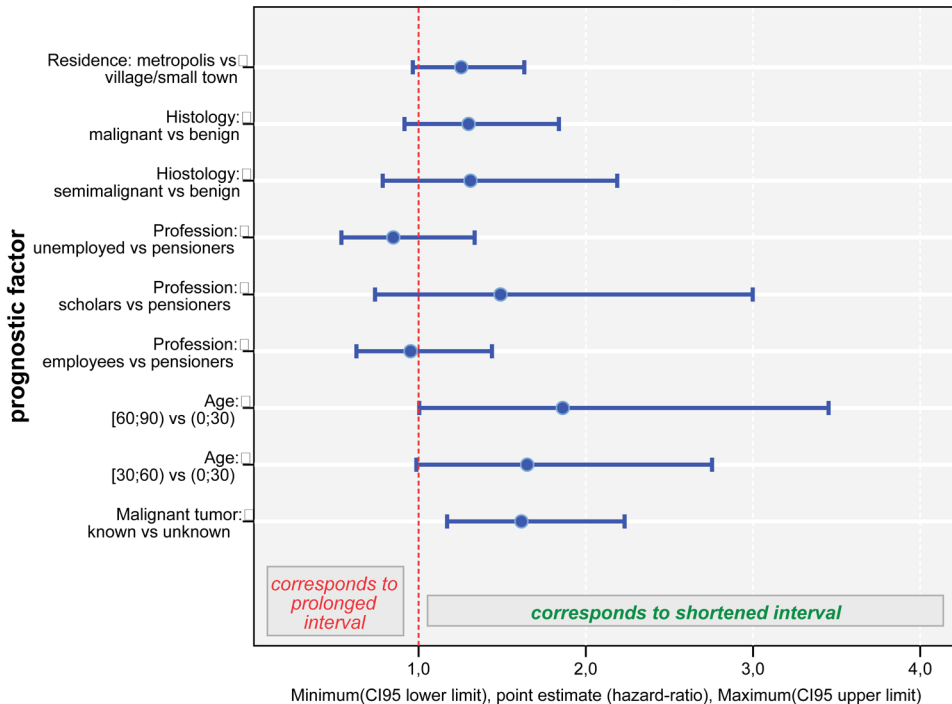

Supplement: MOESM5 [file 9471256]
